# Supplementary material
Source: publisher site journal article supplement (https://www.dovepress.com/article/319061)
Supplement: Supplementary file 1 [file get_supplementary_file.php]

## Supplementary Material

### Identification of The Role of Wnt/ $\beta$ -catenin Pathway through Integrated Analyses and *in vivo* Experiments in Vitiligo

**Table S1** The Clinical Information of The Patients

| Patient ID | Gender | Age | Duration | Progression | Classification | BSA <sup>a</sup> | Biopsy Area     | Associated Disorders <sup>b</sup> or Family History |
|------------|--------|-----|----------|-------------|----------------|------------------|-----------------|-----------------------------------------------------|
| 1          | F      | 62Y | 2Y       | Stable      | NSV            | 1%               | Vulva           | N                                                   |
| 2          | F      | 37Y | 1Y       | Stable      | NSV            | 4%               | Scalp           | N                                                   |
| 3          | M      | 18Y | 3Y       | Stable      | NSV            | 1.5%             | Face            | N                                                   |
| 4          | M      | 26Y | 2Y       | Stable      | NSV            | 3%               | Prepuce         | N                                                   |
| 5          | F      | 22Y | 5 Mon    | Unstable    | NSV            | 2%               | Upper Limb      | N                                                   |
| 6          | F      | 25Y | 13Mon    | Unstable    | NSV            | 4%               | Perianal Region | N                                                   |

**Notes:** **a.** The severity of the disease is scored by body surface area(BSA) of depigmentation.

**b.** Associated disorders include psoriasis, alopecia areata, lupus erythematosus, rheumatoid

arthritis, diabetes and so on. All patients had not received vitiligo-related treatment prior to

surgical biopsy. **Abbreviations:** F, female; M, male; Y, years; Mon, months; NSV,

nonsegmental vitiligo; BSA, body surface area; N, none;

**Table S2** The Clinical Information of The Healthy Volunteer

| Healthy Volunteer ID | Gender | Age | Biopsy Area     | Associated Disorders <sup>a</sup> or Family History of Vitiligo |
|----------------------|--------|-----|-----------------|-----------------------------------------------------------------|
| 1                    | F      | 29Y | Cervical Region | N                                                               |
| 2                    | F      | 28Y | Back            | N                                                               |
| 3                    | M      | 36Y | Cervical Region | N                                                               |
| 4                    | M      | 48Y | Face            | N                                                               |
| 5                    | F      | 29Y | Back            | N                                                               |
| 6                    | M      | 32Y | Upper Limb      | N                                                               |

**Notes: a.** Associated disorders include psoriasis, alopecia areata, lupus erythematosus, rheumatoid arthritis, diabetes and so on.

**Abbreviations:** F, female; M, male; Y, years; N, none.

**Table S3** The q-PCR Reaction Conditions

| Stages | Reps | Temperature | Time  |
|--------|------|-------------|-------|
| Stage1 | 1    | 95°C        | 5min  |
| Stage2 | 40   | 95°C        | 10sec |
|        |      | 60°C        | 30sec |
| Stage3 | 1    | 95°C        | 15sec |
|        |      | 60°C        | 60sec |
|        |      | 95°C        | 15sec |

Abbreviations: min: minute; sec: second.

**Table S4** The Primer Information For q-PCR Analysis in Zebrafish.

| Gene                                           | Primer Sequence (5'to 3')          |
|------------------------------------------------|------------------------------------|
| <i><math>\beta</math>-actin</i> <sup>1</sup>   | Forward: GAAGGAGATCACCTCTCTTGCTC   |
|                                                | Reverse: GTTCTGTTTAGAAGCACTTCCTGTG |
| <i>tyr</i>                                     | Forward: ACTACCGAGAGGCAGAGGTTTCATC |
|                                                | Reverse: TTGGCGAACATTGGCGTGGAG     |
| <i>mitf</i> <sup>2</sup>                       | Forward: TGTACAGCAATCATGCTCTTCC    |
|                                                | Reverse: GTCCCCAGCTCCTTAATTCTGTC   |
| <i><math>\beta</math>-catenin</i> <sup>3</sup> | Forward: CAAGAGCAAGTAGCAGACATCG    |
|                                                | Reverse: CTGTGTGGAAGGTATCTGCATG    |
| <i>lef1</i> <sup>4</sup>                       | Forward: CACGTTCTACACCTGTCCCTAA    |
|                                                | Reverse: AAGCAAGTGAGCGAGTGGACAT    |

**Source / reference of the primers:**

1. Wehner D, Cizelsky W, Vasudevaro MD, et al. Wnt/ $\beta$ -catenin signaling defines organizing centers that orchestrate growth and differentiation of the regenerating zebrafish caudal fin. *Cell Rep.* 2014;6(3):467-81. doi: 10.1016/j.celrep.2013.12.036.
2. Lister JA, Capper A, Zeng Z, et al. A conditional zebrafish MITF mutation reveals MITF levels are critical for melanoma promotion vs. regression *in vivo*. *J Invest Dermatol.* 2014;134(1):133-140. doi: 10.1038/jid.2013.293.

3. Gorsuch RA, Lahne M, Yarka CE, Petravick ME, Li J, Hyde DR. Sox2 regulates Müller glia reprogramming and proliferation in the regenerating zebrafish retina via Lin28 and *Ascl1a*. *Exp Eye Res.* 2017;161:174-192. doi: 10.1016/j.exer.2017.05.012.
4. Yin A, Korzh S, Winata CL, Korzh V, Gong Z. Wnt signaling is required for early development of zebrafish swimbladder. *PLoS One.* 2011;6(3):e18431. doi: 10.1371/journal.pone.0018431.

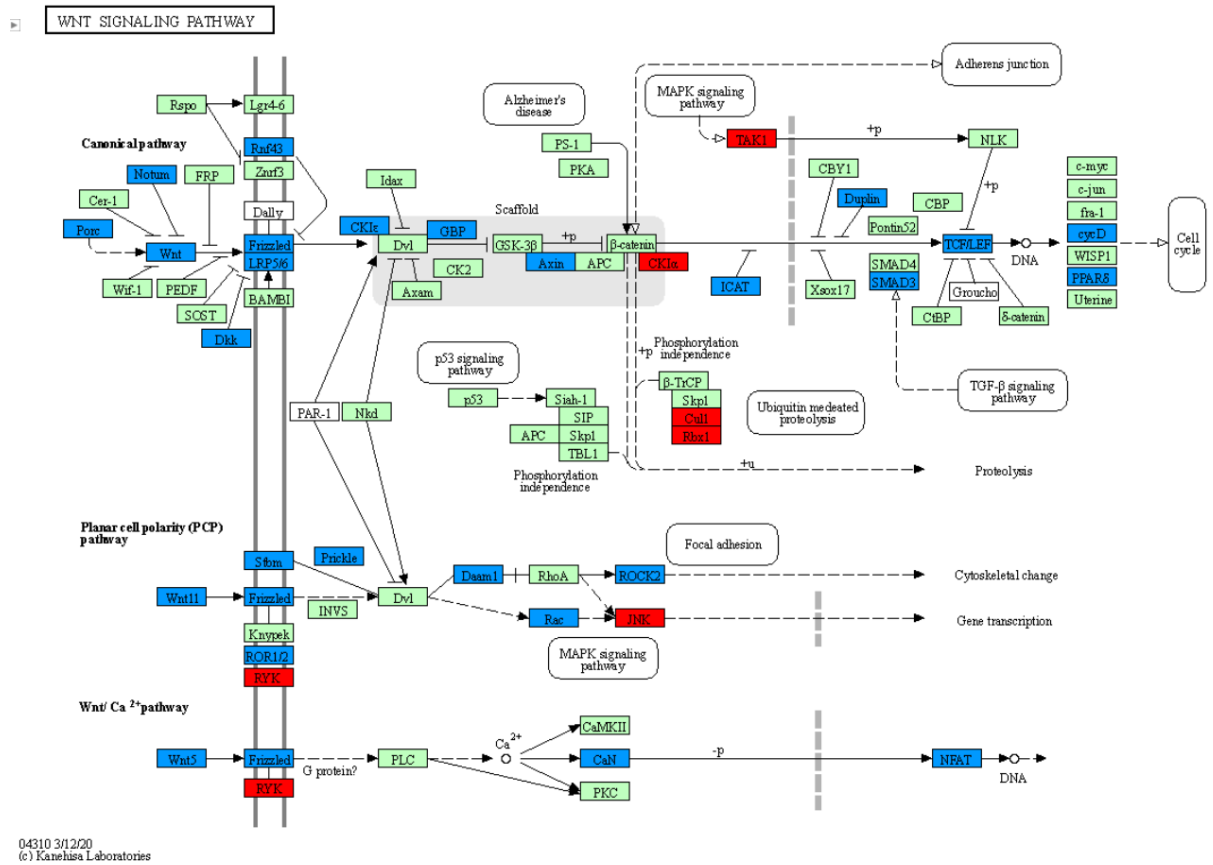

**Figure S1** DEGs enriched in Wnt signaling pathway. Red represented upregulated DEGs and

Blue represented downregulated DEGs. DEGs, differentially expressed genes.

Reproduced from: Kanehisa M, Furumichi M, Sato Y, Ishiguro-Watanabe M, Tanabe M. KEGG: integrating viruses and cellular organisms. *Nucleic Acids Res.* 2021;49(D1):D545-D551. doi: 10.1093/nar/gkaa970

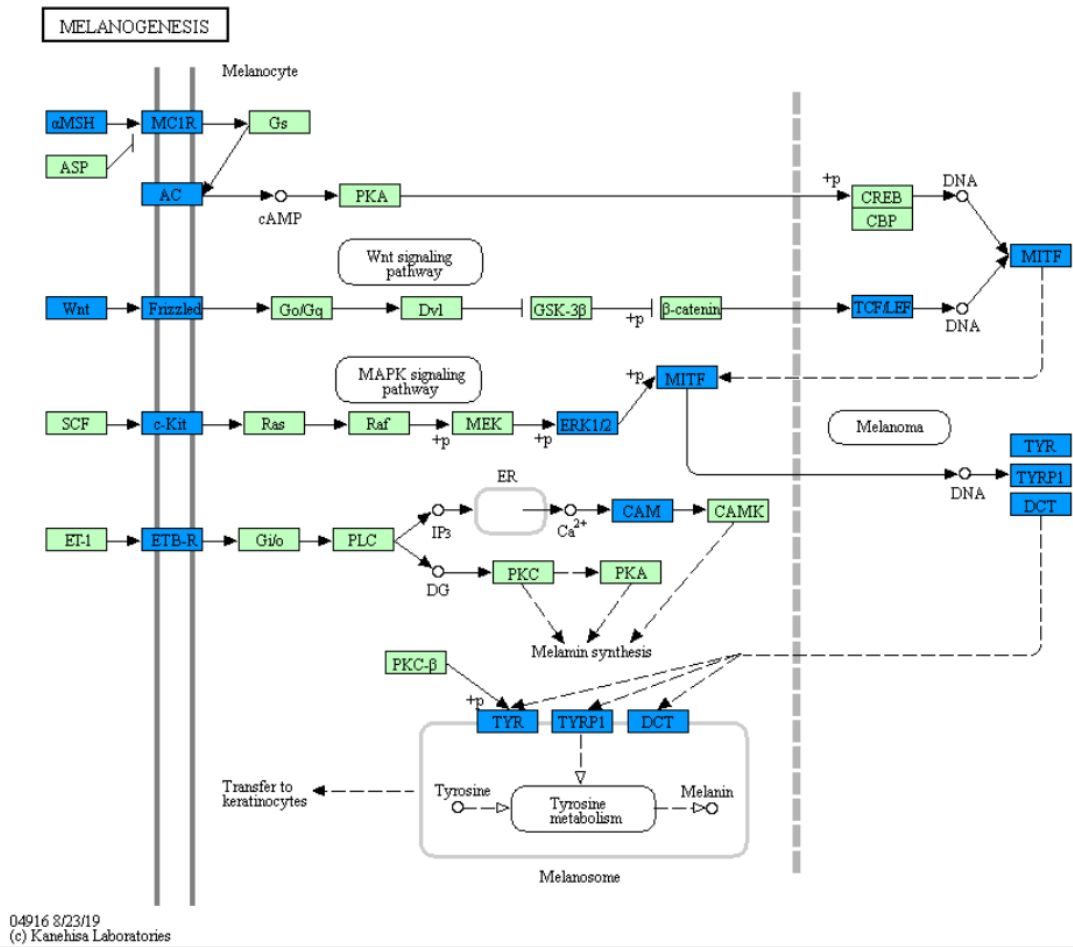

**Figure S2** DEGs enriched in Melanogenesis signaling pathway. Red represented upregulated DEGs and Blue represented downregulated DEGs. DEGs, differentially expressed genes.

Reproduced from: Kanehisa M, Furumichi M, Sato Y, Ishiguro-Watanabe M, Tanabe M. KEGG: integrating viruses and cellular organisms. *Nucleic Acids Res.* 2021;49(D1):D545-D551. doi: 10.1093/nar/gkaa970

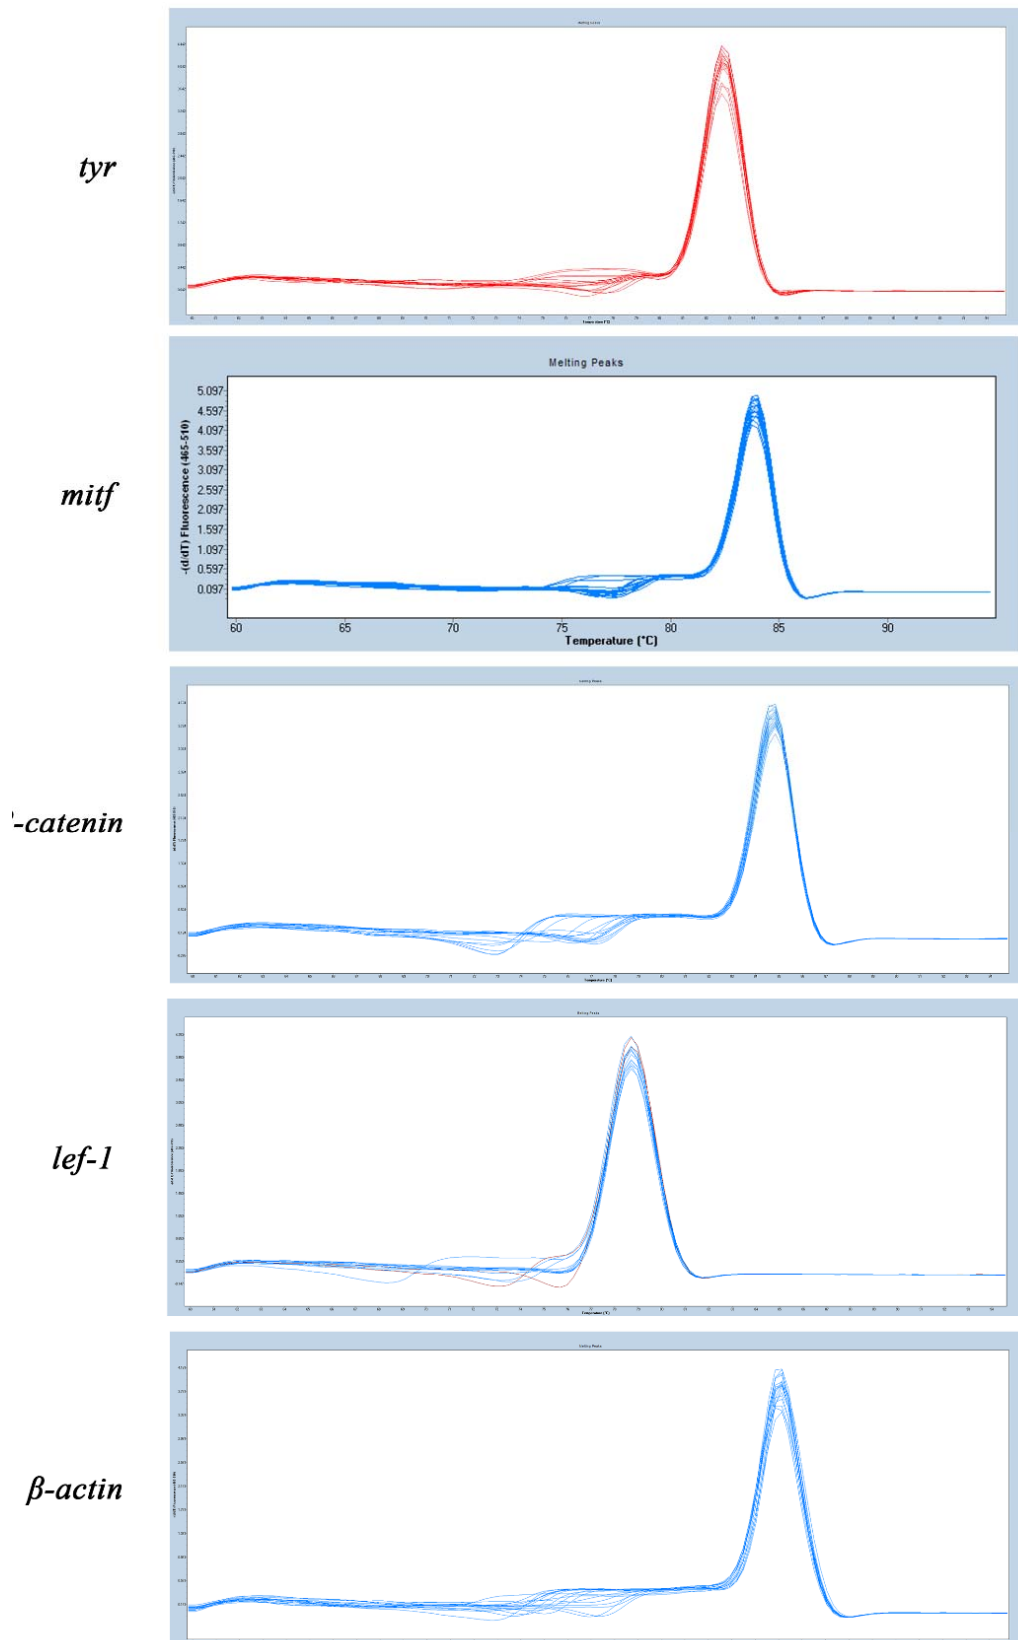

**Figure S3** Melt-curve analysis of *tyr*, *mitf*,  $\beta$ -*catenin*, *lef-1* and  $\beta$ -*actin* genes. The melting curves are single peaks, indicating that the products of q-PCR are specific.
